# Supplementary material for: 3DSMILES-GPT: 3D molecular pocket-based generation with token-only large language model
Source: Royal Society of Chemistry journal article supplement (doi:10.1039/d4sc06864e), 2024-12-04
Supplement: d4sc06864e1.pdf [file d4sc06864e1.pdf]

## Supplementary Information

**Table S1 | Jensen–Shannon divergence ( $\times 10^{-3}$ ) between the bond length**

| Bond | Pocket2Mol | TargetDiff    | Lingo3DMol | 3DSMILES-GPT  |
|------|------------|---------------|------------|---------------|
| C-C  | 0.4422     | <b>0.3035</b> | 0.4062     | 0.4285        |
| C=C  | 0.3091     | <b>0.2014</b> | 0.5038     | 0.3994        |
| C#C  | 0.7276     | 0.6726        | 0.7048     | <b>0.577</b>  |
| C:C  | 0.4273     | <b>0.199</b>  | 0.411      | 0.4711        |
| C-N  | 0.3251     | <b>0.2419</b> | 0.4        | 0.4183        |
| C=N  | 0.3776     | <b>0.1597</b> | 0.6044     | 0.4086        |
| C#N  | 0.7487     | 0.6514        | 0.5625     | <b>0.4789</b> |
| C:N  | 0.4186     | <b>0.1315</b> | 0.4128     | 0.4596        |
| N-O  | 0.3743     | <b>0.3997</b> | 0.6086     | 0.4234        |
| N=O  | 0.5625     | 0.6684        | 0.7832     | <b>0.5534</b> |
| C-O  | 0.3272     | <b>0.2997</b> | 0.4084     | 0.409         |
| C=O  | 0.4604     | <b>0.4006</b> | 0.4992     | 0.4796        |
| C:O  | 0.5066     | <b>0.4483</b> | 0.486      | 0.4805        |
| C-F  | 0.4775     | <b>0.3141</b> | 0.4882     | 0.4769        |
| C-S  | 0.5076     | 0.3349        | 0.2188     | <b>0.2164</b> |
| C=S  | 0.5684     | 0.5845        | 0.8325     | <b>0.5128</b> |
| C:S  | 0.4105     | 0.388         | 0.3368     | <b>0.3084</b> |

|      |        |               |               |               |
|------|--------|---------------|---------------|---------------|
| O-S  | 0.8054 | <b>0.3567</b> | 0.7434        | 0.6134        |
| O=S  | 0.6534 | 0.6987        | 0.7126        | <b>0.4556</b> |
| C-Cl | 0.3652 | 0.3433        | <b>0.1766</b> | 0.2284        |

**Table S2 | The performance in PoseBusters benchmark.**

| <b>Metrics</b>           | All atoms<br>connected | Bond<br>lengths | Bond<br>angles | Internal<br>steric<br>clash | Aromatic<br>ring<br>flatness | Double<br>bond<br>flatness | Internal<br>energy | Overall<br>pass Rate |
|--------------------------|------------------------|-----------------|----------------|-----------------------------|------------------------------|----------------------------|--------------------|----------------------|
| <b>Ref.</b>              | ≈1.00                  | 1               | 1              | 0.95                        | 1.00                         | ≈1.00                      | 1                  | 0.95                 |
| <b>Pocket2Mol</b>        | 1                      | 0.92            | <b>0.99</b>    | <b>0.99</b>                 | 0.99                         | 0.99                       | <b>0.97</b>        | <b>0.86</b>          |
| <b>TargetDiff</b>        | 1                      | 0.99            | 0.75           | 0.92                        | 1                            | <b>1</b>                   | 0.74               | 0.50                 |
| <b>Lingo3DMol</b>        | 1                      | 0.91            | 0.55           | 0.59                        | 0.99                         | ≈1.00                      | 0.58               | 0.17                 |
| <b>3DSMILES-<br/>GPT</b> | 1                      | <b>0.98</b>     | 0.98           | 0.97                        | ≈ <b>1.00</b>                | <b>1</b>                   | 0.92               | <b>0.86</b>          |

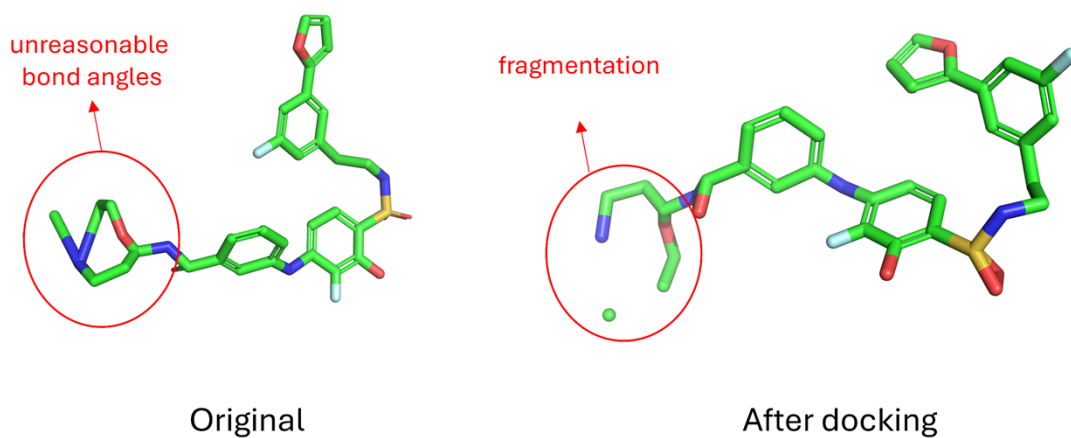

**Fig S1.** Comparison of the conformations of a generated molecule before and after docking.
